# Supplementary material for: The NRF2 transcriptional target NQO1 has low mRNA levels in TP53-mutated endometrial carcinomas
Source: PLoS One. 2019 Mar 25;14(3):e0214416. doi: 10.1371/journal.pone.0214416 (PMC6433262; doi:10.1371/journal.pone.0214416)
Supplement: S3 Method — (XLSX) [file pone.0214416.s012.xlsx]

## Sheet: parameters
parameters	value
allow_complex	1
allow_indels	1
allow_mnps	1
allow_snps	1
data_quality_stringency	5
do_mnp_realignment	1
do_snp_realignment	1
downsample_to_coverage	4000
filter_deletion_predictions	0.3
filter_insertion_predictions	0.3
filter_unusual_predictions	0.3
gen_min_alt_allele_freq	0.02
gen_min_coverage	6
gen_min_indel_alt_allele_freq	0.1
heavy_tailed	3
hotspot_min_allele_freq	0.02
hotspot_min_cov_each_strand	0
hotspot_min_coverage	5
hotspot_min_variant_score	6
hotspot_strand_bias	1
hotspot_strand_bias_pval	0.01
hp_max_length	15
indel_as_hpindel	0
indel_min_allele_freq	0.02
indel_min_cov_each_strand	4
indel_min_coverage	10
indel_min_variant_score	6
indel_strand_bias	1
indel_strand_bias_pval	1
kmer_len	19
max_hp_length	15
min_indel_size	4
min_mapping_qv	4
min_var_count	4
min_var_freq	0.1
mnp_min_allele_freq	0.02
mnp_min_cov_each_strand	0
mnp_min_coverage	6
mnp_min_variant_score	6
mnp_strand_bias	1
mnp_strand_bias_pval	0.01
outlier_probability	0.005
output_mnv	1
override	1
position_bias	0.75
position_bias_pval	0.05
position_bias_ref_fraction	0.05
prediction_precision	1
read_max_mismatch_fraction	1
read_snp_limit	10
realignment_threshold	1
relative_strand_bias	1
short_suffix_match	5
snp_min_allele_freq	0.02
snp_min_cov_each_strand	0
snp_min_coverage	5
snp_min_variant_score	6
snp_strand_bias	1
snp_strand_bias_pval	0.01
sse_prob_threshold	1
suppress_recalibration	0
trimreads	true
ts_version	5
use_position_bias	0

## Sheet: legends
Main settings
The first five parameters support different thresholds for SNP, indel, and hotspot variants. The others use the same thresholds for all variant types.
Parameter	Comments
Minimum allele frequency	Minimum observed allele frequency required for a non-reference variant call.
min_allele_freq	Lowering this value improves sensitivity and decreases specificity (and increases the ratio of false positives to true positives).
	Allowed values: Floats 0.0 - 1.0 Recommended values for SNPs: Between 0.01 - 0.2 Recommended values for indels: Between 0.05 - 0.2
Minimum quality	Do not call variants if the phred-scaled call quality is below this value.
min_variant_score	Lowering this value improves sensitivity and decreases specificity.
	Allowed values: Integers >= 0 Recommended values: >= 10
Minimum coverage	Do not call variants if the total coverage on both strands is below this value.
min_coverage	For germ line workflows, lowering coverage improves sensitivity.
	Lowering this value is dangerous for homopolymer indels this decreases specificity drastically.
	Allowed values: Integers >= 0 Recommended values for SNPs: Between 5 - 20 Recommended values for indels: Between 15 - 30 Recommended values for hotspots: Between 5 - 20
Minimum coverage on either strand	Do not call variants if coverage on either strand is below this value.
min_cov_each_strand	For indel calling, reducing this value improves sensitivity but at a high cost of specificity.
	Allowed values: Integers >= 0 Recommended values: >= 3
Maximum strand bias	Do not call variants if the proportion of variant alleles comes overwhelmingly from one strand.
strand_bias	Allowed values: Floats 0.5 - 1.0 Recommended values for SNPs: 0.95 Recommended values for indels: 0.85 Recommended values for hotspots: 0.95
	Increasing strand bias increases sensitivity. SNP calling tolerates this adjustment better than indel calling. Related to VCF field STB.
Minimum relative read quality	Do not call variants if Relative Read Quality is below this threshold. A phred-scaled minimum average evidence per read or no-call.
data_quality_stringency	Allowed values: Floats >= 0 Recommended values: >= 6.5
	Impact of changing this value: Lowering this value improves sensitivity and decreases specificity. Related to VCF field MLLD.
Maximum common signal shift	Do not call variants if Common Signal Shift exceeds this threshold. If the predictions are distorted to fit the data more than this distance (relative to the size of the variant), filter this candidate position out. Allowed values: Floats >= 0 Recommended: 0.3 = 30% of variant change size. Related to VCF field RBI.
filter_unusual_predictions
Maximum reference/variant signal shift (insertions) filter_insertion_predictions	Do not call insertions if Reference or Variant Signal Shift exceeds this threshold.Filter observed clusters that deviate from predictions by more than this amount (relative to the size of the variant).
	Allowed values: Floats >= 0 Recommended: 0.2 (which is 20% of variant change size). Related to VCF fields VARB and REFB.
Maximum reference/variant signal shift (deletions) filter_deletion_predictions	Do not call deletions if Reference or Variant Signal Shift exceeds this threshold.
	Filter observed clusters that deviate from predictions by more than this amount (relative to the size of the variant).
	Allowed values: Floats >= 0 Recommended: 0.2 (which is 20% of variant change size). Related to VCF fields VARB and REFB.
Torrent Variant Caller advanced parameters
Parameter	Comments
hp_max_length	Maximum homopolymer length for calling indels.
	Allowed values: Integers >= 1 Recommended value: 8
	Related to VCF field HRUN.
downsample_to_coverage	Reduce coverage in over-sampled locations to this value.
	Allowed values: Integers>= 1 Recommended values: 400 (germline), 2000 (somatic)
outlier_probability	Prior probability that a read comes from some other distribution.
	Lower numbers reduce the influence of outlier observations. Higher numbers increase the influence of outliers. Empirical adjustment indicates that increasing the influence of outliers leads to more false-positives and slightly more true positives, but at a poor tradeoff.
	Allowed values: Floats 0.0 - 1.0 Recommended values: Between 0.005 - 0.01
do_snp_realignment	Realign reads in the vicinity of SNP candidates.
	Allowed values:
	0: Do no realign. Recommended for germline.
	1: Realign. Recommended for somatic.
prediction_precision	Number of pseudo-data-points suggesting our predictions match the measurements without bias.
	Allowed values: Floats >= 0.0
	Recommended value: 1.0
	Impact of changing this value: Lowering this value increases specificity and decreases sensitivity.
heavy_tailed	How heavy the T-distribution tails are to allow for unusual spread in the data. This value represents the prior probability that a given read comes from some distribution other than the possibilities being evaluated.
	Lower values mean that more reads are forced to be assigned to one of the tested alleles, even at very poor data fit (fewer reads are thrown out, with the likely tradeoff of more false positive calls). Higher values mean that reads that are merely slightly noisy are thrown away, resulting in poorer sensitivity.
	The proportion of reads that are discarded as outliers is shown in the FXX info tag in the output VCF file.
suppress_recalibration	Ignore the base recalibration values from pipeline in TVC. (Changes the way signal is predicted.)
	Allowed values:
	0: Use base calibration values in TVC. Recommended for Ion Proton™ data.
	1: Ignore base calibration values in TVC.
hotspot_strand_bias_pval	First we calculate a bootstrap estimate of the pval to test significance of observed strand bias against the null hypothesis of no strand bias.
indel_strand_bias_pval	If this pval estimate is lower than the parameter value (hotspot, indel, mnp or snp_strand_bias_pval) and the observed strand bias is higher than the hotspot, indel, mnp or snp_strand_bias then this variant will be filtered.
mnp_strand_bias_pval	Lowering this value makes filtering less stringent.
snp_strand_bias_pval	Allowed values:
	0-1
	Default value:
	1
mnp_min_allele_freq	Minimum observed allele frequency required for a non-reference variant call. Lowering this value improves sensitivity and decreases specificity (and increases the ratio of false positives to true positives).
	Allowed values:
	0.0-1.0
	Default value:
	0.01-0.2
mnp_min_variant_score	Do not call variants if the phred-scaled call quality is below this value.Lowering this value improves sensitivity anddecreases specificity.
	Allowed values:
	integers >=0
	Default value:
	>=10
mnp_min_cov_each_strand	Do not call variants if coverage on either strand is below this value. For indel calling, reducing this value improves sensitivity but at a high cost of specificity.
	Allowed values:
	integers >=0
mnp_min_coverage	Do not call variants if the total coverage on both strands is below this value.For germ line workflows, lowering coverage improves sensitivity. Lowering this value is dangerous for homopolymer indels - this decreases specificity drastically.
	Allowed values:
	integers >=0
	Default value:
	2020-05-01
mnp_strand_bias	Do not call variants if the proportion of variant allelesfrom one strand if higher than this ratio.
	Allowed values:
	0.5-1.0
	Default value:
	0.95
do_mnp_realignment	Realign reads in the vicinity of candidate mnp variants.
	Allowed values:
	0 = off
	1 = on
realignment_threshold	Maximum allowed fraction of reads where realignment causes an alignment change
	Allowed values:
	0-1
	Default value:
	1
use_position_bias	Enables the position bias filter.
	Allowed values:
	0-1
	Default value:
	0
position_bias	Filter out variants with position bias relative to soft clip ends in reads > position-bias given pval < postion-bias-pval.
	Allowed values:
	0-1
	Default value:
	0.75
position_bias_pval	Filter out if position bias > position-bias given pval < position-bias-pval.
	Position_bias_pval is threshold for filtering if the pval for testing whether the position-bias is statistically significant against the null hypothesis of no position bias is lower than the threshold and the position_bias is higher than the position_bias threshold.
	Note that filtering only occurs if both the pval and the position bias is higher than the position_bias_pval and the position bias is higher than position_bias.
	Lowering this value makes filtering less stringent.
	Allowed values:
	0-1
	Default value:
	0.05
position_bias_ref_fraction	Skips position bias filtering if (reference read count)/ (reference + alt allele read count) <= to this value.
	Lowering this value makes filtering more stringent.
	Allowed values:
	0-1
	Default value:
	0.05
sse_prob_threshold*	Filters out variants in motifs with error rates above this. Advanced filtering: read the docs before changing.
	Allowed values:
	0-1
	Default value:
	0.2
indel_as_hpindel	Apply indel filters to non HP indels.
	Allowed values:
	0 = on
	1 = off
	Default value:
	0
